# Supplementary material for: Assessing different imaging velocimetry techniques to measure shallow runoff velocities during rain events using an urban drainage physical model
Source: Copernicus journal article supplement (doi:10.5194/hess-2020-136), 2020-05-06
Supplement: Supplementary file 1 [file hess-2020-136-supplement.pdf]

## *SUPPLEMENTARY MATERIAL*

### **Assessing different imaging velocimetry techniques to measure shallow runoff velocities during rain events using an urban drainage physical model**

Juan Naves<sup>1</sup>, Juan T. García<sup>2</sup>, Jerónimo Puertas<sup>1</sup>, Joaquín Suárez<sup>1</sup>, Jose Anta<sup>1</sup>

<sup>1</sup>Universidade da Coruña, Water and Environmental Engineering Research Team (GEAMA), Civil Engineering School, A Coruña, 15071, Spain

<sup>2</sup>Mining and Civil Engineering Department, Universidad Politécnica de Cartagena, Cartagena, 30203, Spain

*Correspondence to:* Juan Naves (juan.naves@udc.es)

## S1. Complementary results for the sensitivity analysis

30 mm h<sup>-1</sup>-rain-intensity experiments

- Pre-processing parameter ( $X_{\text{ref\_LSPIV}} = 25\%$ ,  $X_{\text{ref\_LSPIV}^+} = 0.25$ ,  $X_{\text{ref\_SSIV}} = 15\%$ ,  $X_{\text{ref\_BIV}} = 0.6$ )
- IA size ( $X_{\text{ref}} = 32$  px)
- FAR ( $X_{\text{ref}} = 25$  Hz)

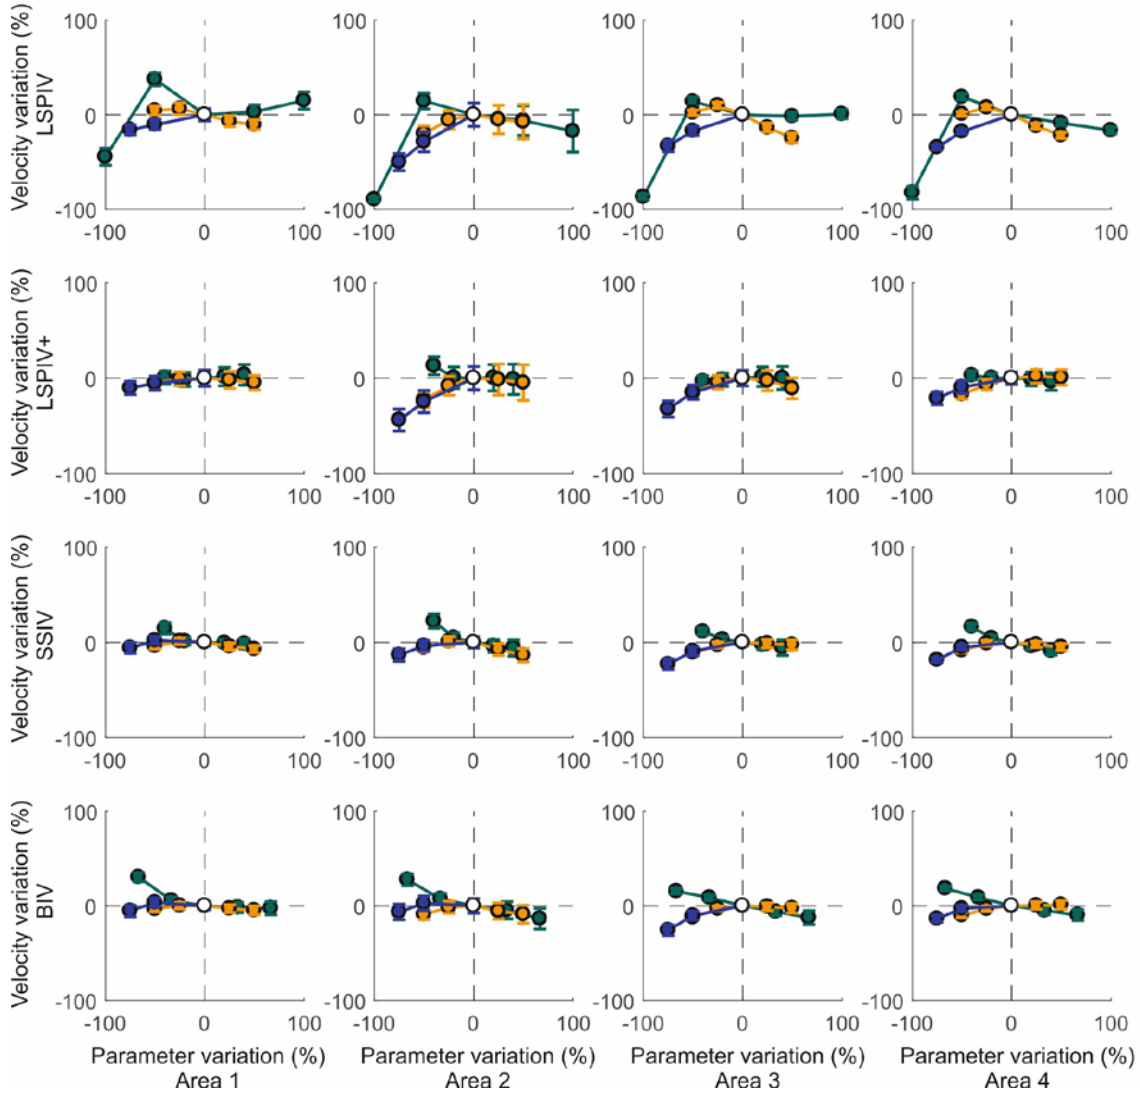

**Figure S1:** Percentage of variation in the mean velocities when varying parameters of the analysis for the four studied areas (columns) and the four imaging velocimetry techniques considered (rows) in the case of 30 mm h<sup>-1</sup> rainfall. Mean velocity variability for the different pairs of frames analyzed are included using whiskers.

80 mm h<sup>-1</sup>-rain-intensity experiments

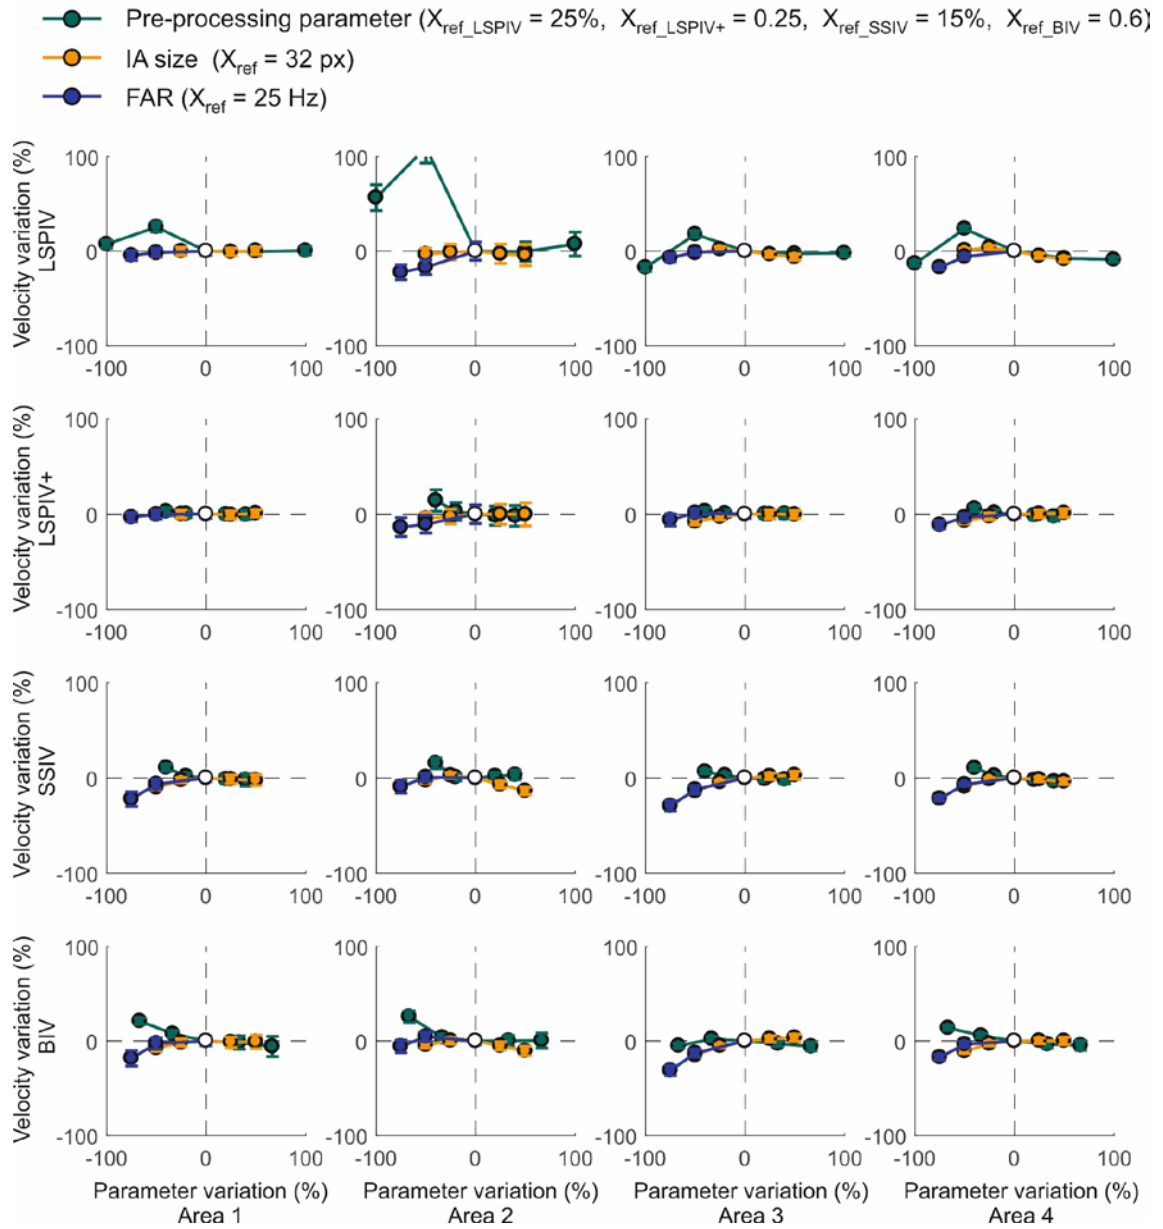

**Figure S2:** Percentage of variation in the mean velocities when varying parameters of the analysis for the four studied areas (columns) and the four imaging velocimetry techniques considered (rows) in the case of 80 mm h<sup>-1</sup> rainfall. Mean velocity variability for the different pairs of frames analyzed are included using whiskers.

## S2. Complementary results for the velocity results comparison

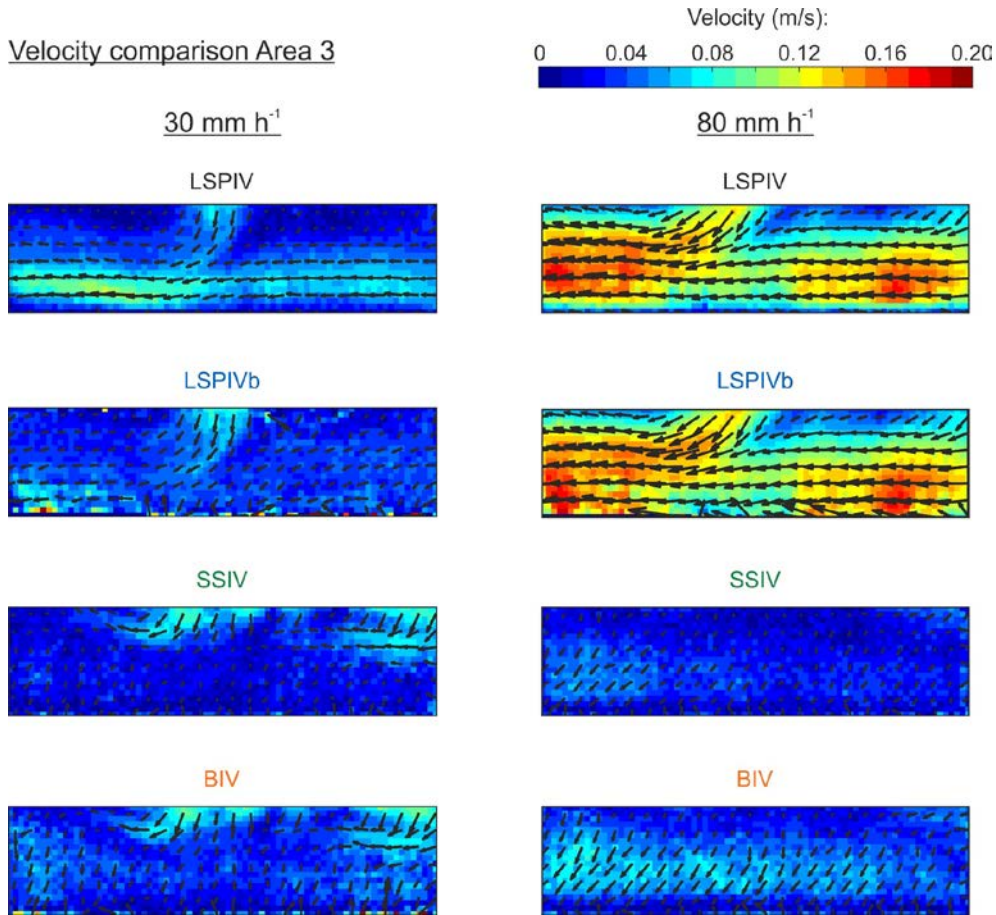

Figure S3: Velocity fields obtained for the cases of  $30 \text{ mm h}^{-1}$  and  $80 \text{ mm h}^{-1}$  in Area 3.

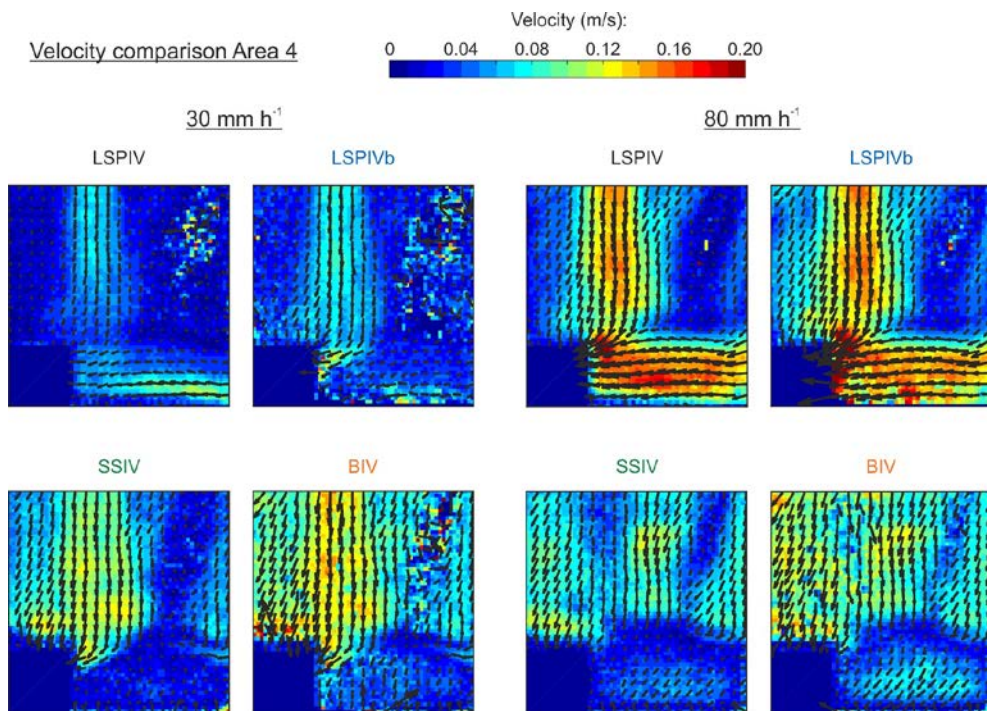

Figure S4: Velocity fields obtained for the cases of  $30 \text{ mm h}^{-1}$  and  $80 \text{ mm h}^{-1}$  in Area 4.

### S3. Complementary results for the convergence study

Convergence study: mean velocities (rain intensity = 30 mm h<sup>-1</sup>)

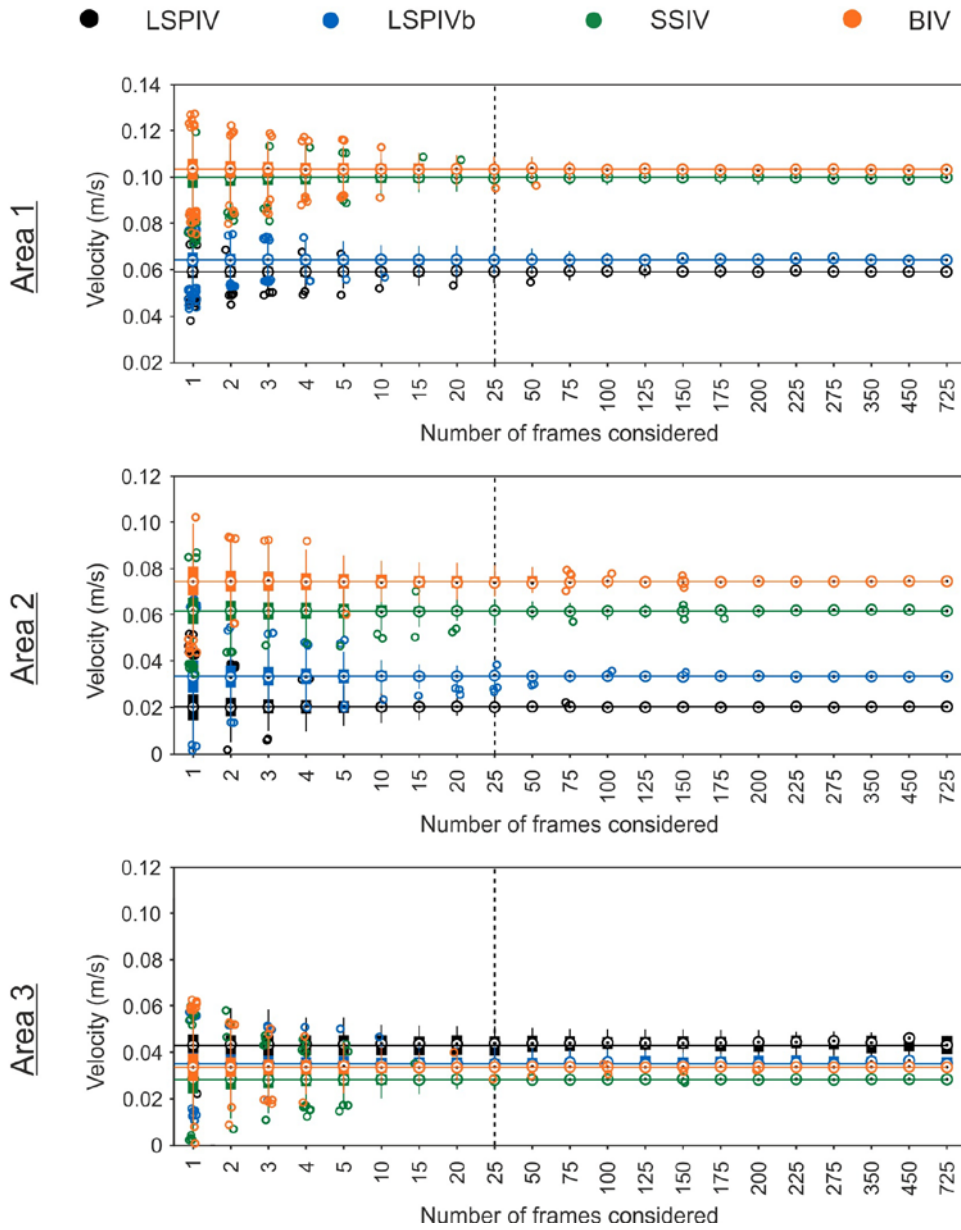

Figure S5: Mean velocity convergence study for rain intensity of 30 mm h<sup>-1</sup> and Areas 1, 2, and 3. The horizontal line represents the mean velocity considering all the frames available (1500) for LSPIV (black), LSPIVb (blue), SSIV (green) and BIV (orange) techniques. Then, the variability in the mean velocity when the frames are divided into groups of different numbers of frames was represented by boxplots.

Convergence study: mean velocities (rain intensity = 80 mm h<sup>-1</sup>)

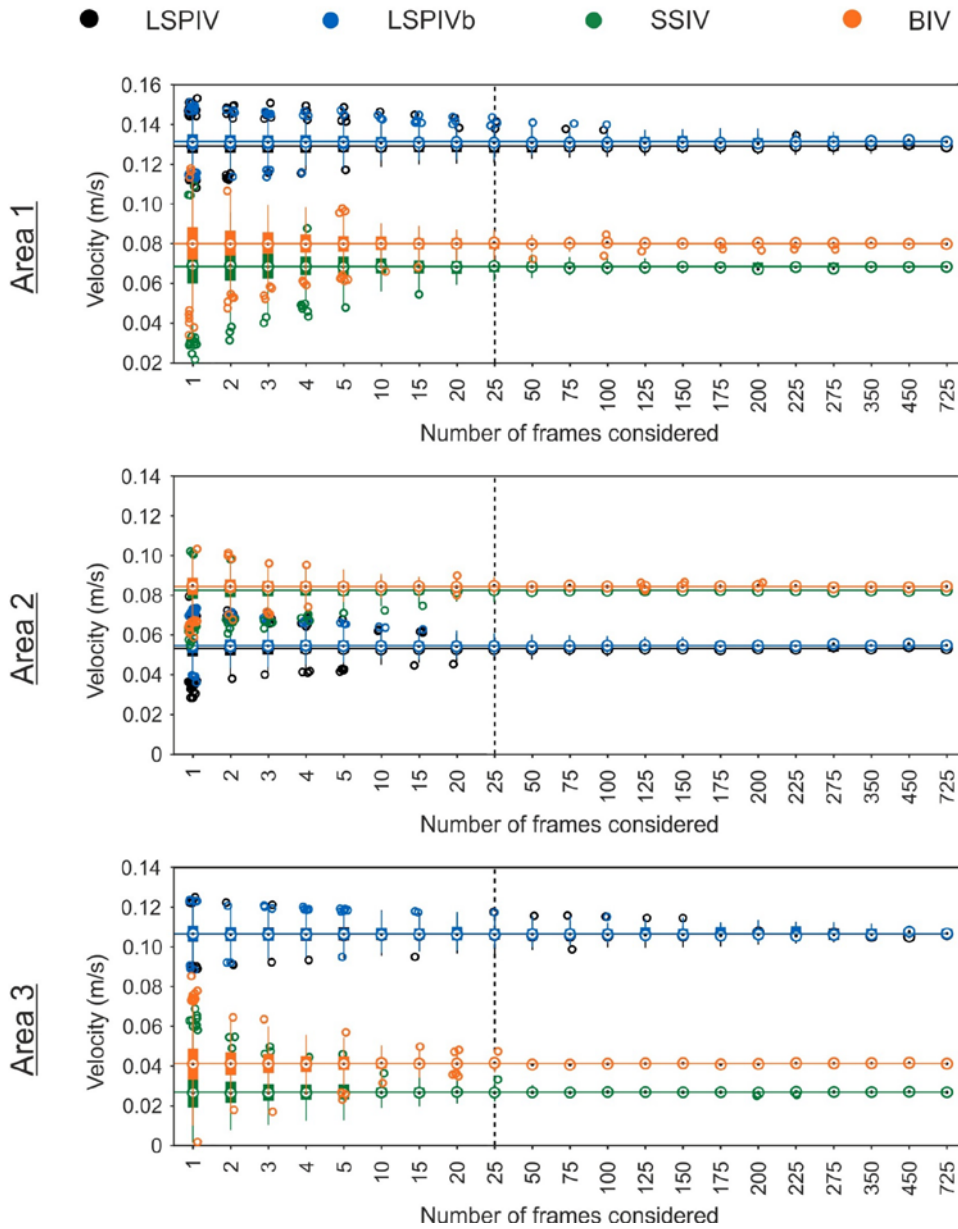

Figure S6: Mean velocity convergence study for rain intensity of 80 mm h<sup>-1</sup> and Areas 1, 2, and 3. The horizontal line represents the mean velocity considering all the frames available (1500) for LSPIV (black), LSPIVb (blue), SSIV (green) and BIV (orange) techniques. Then, the variability in the mean velocity when the frames are divided into groups of different numbers of frames was represented by boxplots.



### Convergence study: mean velocities (Area 4)

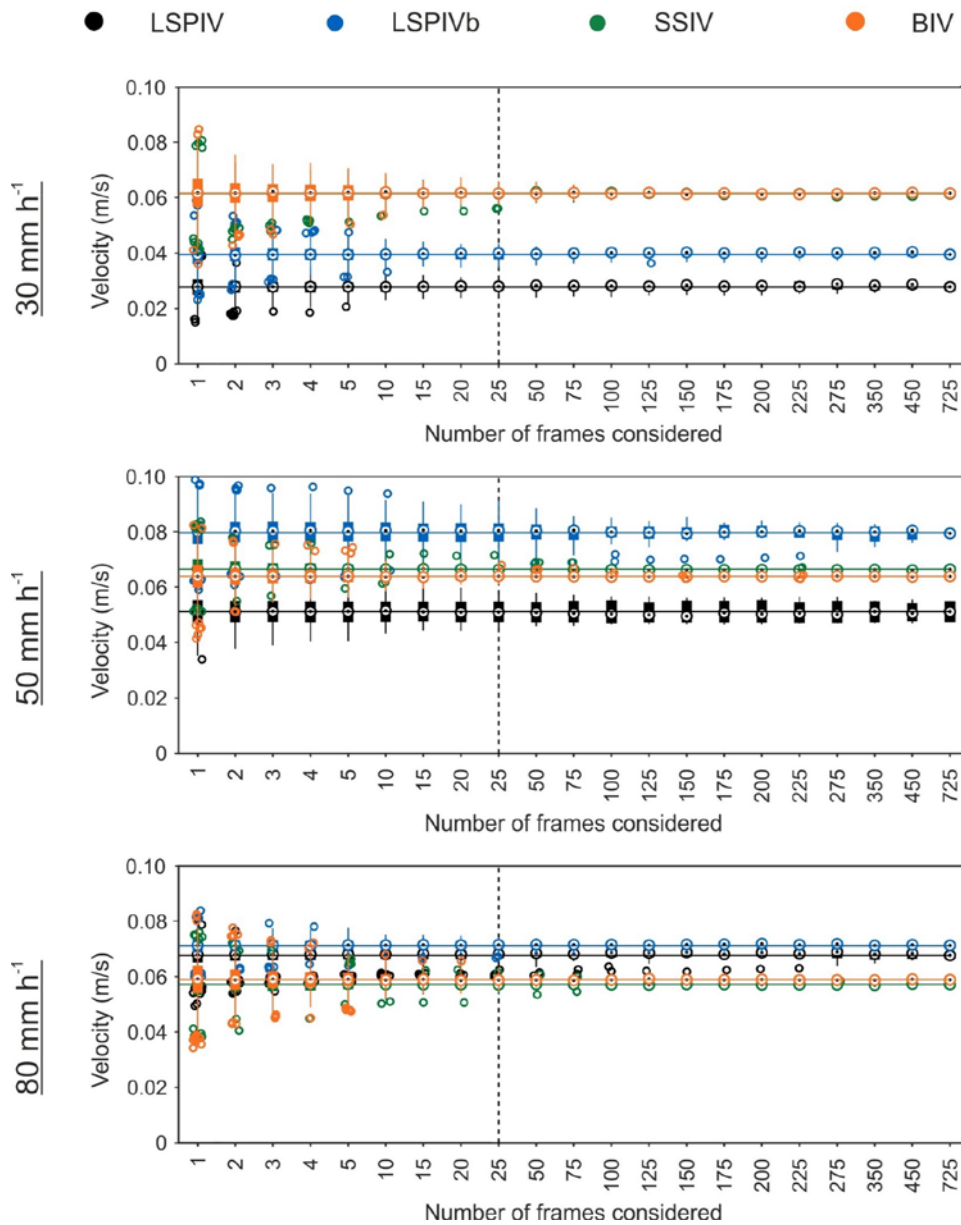

Figure S7. Mean velocity convergence study for Area 4 and rain intensities of 30, 50 and 80 mm h<sup>-1</sup>. The horizontal line represents the mean velocity considering all the frames available (1500) for LSPIV (black), LSPIVb (blue), SSIV (green) and BIV (orange) techniques. Then, the variability in the mean velocity when the frames are divided into groups of different numbers of frames was represented by boxplots.
